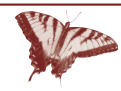

# Mitogenomics of electric rays: evolutionary considerations within Torpediniformes (Batoidea; Chondrichthyes)

JUAN DIEGO GAITÁN-ESPITIA<sup>1,2</sup>, JAIBER J. SOLANO-IGUARAN<sup>1,3</sup>,  
DANIELA TEJADA-MARTINEZ<sup>1,4</sup> and JULIAN F. QUINTERO-GALVIS<sup>1,3\*</sup>

<sup>1</sup>Instituto de Ciencias Ambientales y Evolutivas, Universidad Austral de Chile, Casilla 567, Valdivia, Chile

<sup>2</sup>CSIRO Oceans & Atmosphere, GPO Box 1538, Hobart 7001, TAS, Australia

<sup>3</sup>Programa de Magister en Ciencias mención Genética, Facultad de Ciencias, Universidad Austral de Chile, Valdivia, Chile

<sup>4</sup>Programa de Doctorado en Ciencias mención Ecología y Evolución, Facultad de Ciencias, Universidad Austral de Chile, Valdivia, Chile

Received 17 November 2015; revised 1 February 2016; accepted for publication 8 February 2016

Torpediniformes (electric rays) is a relatively diverse group of benthic coastal elasmobranchs found in all shallow tropical to temperate waters around the world. Despite its ecological and evolutionary importance, the inter-relationships within this lineage of cartilaginous fishes and its phylogenetic position within Batoidea remain controversial. In this study, we report the first complete sequences of two tropical electric rays, *Narcine bancroftii* and *Narcine brasiliensis*, using a combination of 454 and Sanger sequencing technologies. These species are a common bycatch of artisanal fishery communities on the north-east Caribbean coast of Colombia and are considered Critically Endangered according to the International Union for Conservation of Nature classification system. Overall, the two newly sequenced mitogenomes exhibit similarities in size, transcriptional orientation, gene order, and nucleotide composition in comparison to other batoids. Based on the concatenated alignment of protein-coding genes, our phylogenetic analyses support the hypothesis that electric rays are closely related to thornback rays (Platyrrhinidae), forming a clade in a sister position to a group containing the remaining three batoid orders. Within Torpediniformes, our results reject the nonmonophyletic hypothesis of the genus *Narcine* reported in previous morphological and molecular studies.

© 2016 The Linnean Society of London, *Zoological Journal of the Linnean Society*, 2016, **178**: 257–266  
doi: 10.1111/zoj.12417

ADDITIONAL KEYWORDS: elasmobranchs – electric rays – mitogenome – phylogenetic relationships.

## INTRODUCTION

Batoidea (skates, stingrays, and their allies) represents one of the most species-rich groups of extant chondrichthyans with about 630 species spread amongst up to 23 families and four orders (Fowler, 2005; Naylor *et al.*, 2012). This cartilaginous fish lineage is recognized as a monophyletic group sister to all living sharks (Douady *et al.*, 2003; Aschliman

*et al.*, 2012a). Nonetheless, the phylogenetic relationships within Batoidea remain controversial amongst morphologists and molecular biologists, with the most contentious issues concerning the phylogenetic position of the Torpediniformes (Rocco, 2013). From a morphological point of view, Torpediniformes share no known synapomorphies with any other particular taxon within batoids and are considered the sister group of the other batoid taxa (McEachran & Aschliman, 2004; Claeson, 2014). Similar observations have been made in other studies using ribosomal genes (16S and 18S) and on the karyological structure of

\*Corresponding author. E-mail: juadiegaitan@gmail.com

batoids finding that the unique genomic organization, the large quantities of highly repeated DNA, and the characteristic distribution of heterochromatin of electric rays place the Torpediniformes distant from the other batoid species (Rocco *et al.*, 2007; Rocco, 2013). By contrast, molecular studies using partial mitochondrial genomes (mitogenomes) and nuclear genes have suggested that Rajiformes is sister to all other batoids, implicating a disc-like ancestral form, rather than a shark-like form, as previously thought (Aschliman *et al.*, 2012a; Naylor *et al.*, 2012; Franklin, Palmer & Dyke, 2014). In these studies, the electric rays were recovered in a close relationship with the Platyrrhinidae (Aschliman *et al.*, 2012a; Naylor *et al.*, 2012), which is a group of ‘guitarfishes’. Other authors using mitochondrial and molecular markers have found different results, recovering a clade with Pristiformes and Rhinobatiformes as the ancestral batoid group and Torpediniformes in a sister relationship to the Myliobatiformes (Pavan-Kumar *et al.*, 2014). These different hypotheses regarding the evolutionary relationships amongst batoids (Fig. 1) warrant further exploration with additional markers and taxon sampling.

Mitochondrial DNA (mtDNA) is widely used in a range of comparative studies as a tool to infer species relationships (Gaitán-Espitia, Nespolo & Opazo, 2013; Cea, Gaitán-Espitia & Cárdenas, 2015; Dilly, Gaitán-Espitia & Hofmann, 2015; Gaitán-Espitia &

Hofmann, 2016). Characteristics of this molecular resource such as the lack of introns, unambiguous orthology, lack of recombination, broadly uniform rate of molecular evolution, and phylogenetic signal at diverse taxonomic ranks have led many to consider it as a reliable resource for investigations of molecular divergence and deep evolutionary relationships (Boore & Brown, 1998; Bernt *et al.*, 2013a; Botero-Castro *et al.*, 2013; Perseke *et al.*, 2013). Nevertheless, mtDNA can be uninformative if only small portions of the mitogenome are used (Galtier *et al.*, 2009; Poortvliet *et al.*, 2015). This is particularly true in cartilaginous fishes because of the slow rates of mutation exhibited by this group (Martin, Naylor & Palumbi, 1992; Martin, 1995). In these cases, greater resolution can be achieved by using complete mitogenome sequences (Alam *et al.*, 2014; Gillett *et al.*, 2014; Poortvliet *et al.*, 2015), particularly of groups with minimally sequenced genomes such as Torpediniformes. Although a great number of entire mitochondrial genomes have been reported in the Organelle Genome Resources of the National Center for Biotechnology Information for Batoidea (~37), most of these genomes are for species in the orders Myliobatiformes and Rajiformes with 19 and 11, respectively, followed by the Pristiformes/Rhinobatiformes group, which contains six. To date, the Torpediniformes are represented only by the complete mitogenome of the giant electric ray *Narcine*

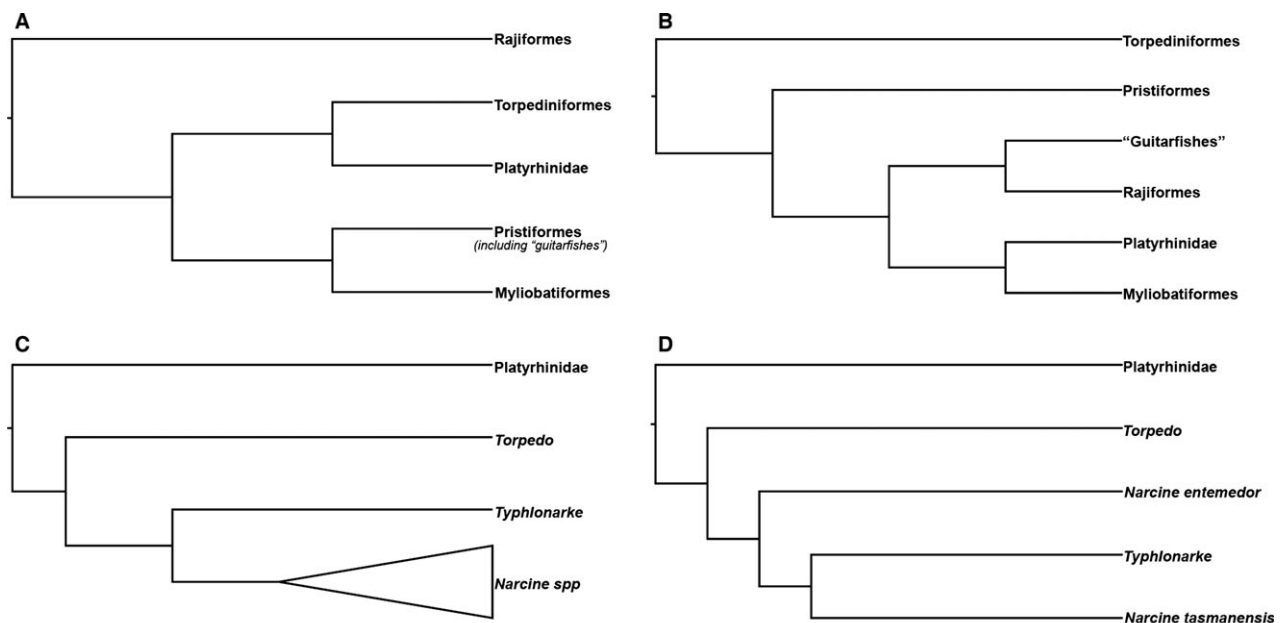

**Figure 1.** Phylogenetic hypotheses regarding the evolutionary relationships amongst batoid fishes. Trees were pruned and modified to better reflect the different levels of comparison and the taxa included in the present study. Reconstructions based on (A) partial mitochondrial and nuclear genes (Aschliman *et al.*, 2012a) and (B) morphological characters (McEachran & Aschliman, 2004) of major groups. Competing hypotheses within Torpediniformes depicting (C) the monophyly (Claeson, 2014) and (D) the paraphyly (Naylor *et al.*, 2012) of the genus *Narcine*.

*entemedor* (Castillo-Páez, del Río-Portilla & Rocha-Olivares, 2014), and three partially sequenced genomes (*Narcine tasmaniensis*, *Typhlonarke aysoni*, and *Torpedo macneilli*) (Table 1). This relatively diverse group of batoids is unquestionably monophyletic, being easily distinguished from other batoids by presenting well-developed pectoral electric organs derived from branchial musculature, smooth skin devoid of dermal denticles or spines, and a highly modified posteriorly arched shoulder girdle, amongst other characters (de Carvalho, Séret & Compagno, 2002). Within Torpediniformes, 12 extant genera gathered in four subfamilies (Torpedininae, Hypninae, Narcininae, and Narkidae) are recognized (Aschliman, Claeson & McEachran, 2012b), but the inter-relationships amongst them remain unresolved (Fig. 1C, D) based on the available molecular (Aschliman *et al.*, 2012a; Naylor *et al.*, 2012) and morphological data (Aschliman *et al.*, 2012b; Claeson, 2014).

In this study we report the first complete sequences of two tropical electric rays, *Narcine bancroftii* and *Narcine brasiliensis* using a combination of 454 and Sanger sequencing technologies. These species are a common bycatch of artisanal fishery communities on the north-east Caribbean coast of Colombia (Gaitán-

Espitia & López, 2008; Ramírez-Hernandez *et al.*, 2011), and are considered Critically Endangered according to the International Union for Conservation of Nature classification system (de Carvalho *et al.*, 2007; Rosa & Furtado, 2007). We characterized the mitogenomic architectures of both species and compared them with other available electric ray mitogenomes. Furthermore, phylogenetic analyses using the protein-coding genes of mitochondrial genomes were conducted with representative species of the other batoid orders to investigate evolutionary relationships and taxonomic groupings.

## MATERIAL AND METHODS

### SAMPLE AND DNA ISOLATION

Fresh liver samples were obtained from five *N. bancroftii* and five *N. brasiliensis* males caught as bycatch by the artisanal fishery community of Don Diego (11°18'N, 73°43'W) and Ahuyama (11°53'N, 72°17'W) on the north-east Caribbean coast of Colombia. Species were identified following the keys and descriptions of McEachran & Carvalho (2002). Intact mitochondria were then removed from approximately

**Table 1.** List of species used in this study

| Order           | Family           | Species                         | GenBank accession no.  |
|-----------------|------------------|---------------------------------|------------------------|
| Torpediniformes | Narcinidae       | <i>Narcine brasiliensis</i>     | KT119410               |
|                 |                  | <i>Narcine bancroftii</i>       | KT119411               |
|                 |                  | <i>Narcine entemedor</i>        | KM386678               |
|                 |                  | <i>Narcine tasmaniensis</i>     | JN171594               |
|                 |                  | <i>Typhlonarke aysoni</i>       | JN184082               |
| Myliobatiformes | Torpedinidae     | <i>Torpedo macneilli</i>        | JN184080               |
|                 | Dasyatidae       | <i>Dasyatis akajei</i>          | KC526959               |
|                 | Gymnuridae       | <i>Gymnura poecilura</i>        | KJ617038               |
|                 | Hexatrygonidae   | <i>Hexatrygon bickelli</i>      | JN184061               |
|                 | Mobulinae        | <i>Mobula japonica</i>          | JX392983               |
|                 | Myliobatidae     | <i>Aetobatus flagellum</i>      | KF482070               |
|                 | Plesiobatidae    | <i>Plesiobatis daviesi</i>      | AY597334               |
|                 | Potamotrygonidae | <i>Potamotrygon motoro</i>      | KF709642               |
|                 | Urolophidae      | <i>Urobatis halleri</i>         | JN184083               |
|                 | Pristiformes     | Pristidae                       | <i>Pristis clavata</i> |
| Rhinobatinae    |                  | <i>Rhinobatos hynnicephalus</i> | KF534708               |
| Anoxypristis    |                  | <i>Anoxypristis cuspidata</i>   | KP233202               |
| Zanobatidae     |                  | <i>Zanobatus schoenleinii</i>   | JN184086               |
| Rhinidae        |                  | <i>Rhina ancylostoma</i>        | JN184074               |
| Rajiformes      | Rhynchobatidae   | <i>Rhynchobatus djiddensis</i>  | JN184077               |
|                 | Anacanthobatidae | <i>Sinobatis bulbicauda</i>     | JN184078               |
|                 | Arhynchobatidae  | <i>Pavoraja nitida</i>          | KJ741403               |
|                 | Platyrhinidae    | <i>Platyrhina sinensis</i>      | JN184068               |
|                 | Rajidae          | <i>Raja rhina</i>               | KC914434               |
| Squalidae       | Atlantoraja      | <i>Atlantoraja castelnaui</i>   | KM507724               |
|                 | Squalidae        | <i>Squalus acanthias</i>        | Y18134                 |
| Chimaeriformes  | Chimaeridae      | <i>Chimaera monstrosa</i>       | AJ310140               |

120 mg tissue of each specimen using a Mitochondrial Isolation Kit (Thermo Scientific). The isolated mitochondrial pellet was used for the mtDNA extraction by means of a Mitochondrial DNA Isolation kit (Bio-Vision, Mountain View, CA). Samples of each species were pooled for sequencing.

#### SEQUENCING, ASSEMBLY, AND MITOGENOME ANNOTATION

Libraries for both electric ray species were sequenced using a combination of 454 (Roche Genome Sequencer GS FLX Titanium) and Sanger sequencing technologies on ABI 3730XL sequencers by Eurofins MWG Operon (Huntsville, USA). DNA samples were nebulized, individually bar-coded to perform emulsion-based clonal amplification and sequenced to approximately 20-fold coverage. As pyrosequencing technology produces characteristic sequencing errors, mostly imprecise signals for longer homopolymer runs (Luo *et al.*, 2012), we developed a stringent quality control procedure, using only reads with high quality scores (i.e. over 40 Q-score). In addition, we used the condensation tool found in the NextGENe software v. 2.3.3 (Softgenetics, State College, PA, USA) to correct for homopolymer errors and other base call errors produced by the pyrosequencing process. The 454 reads were trimmed of adapters, filtered based on quality values (cut-off: base-caller error probability  $P_{\text{error}} = 0.01$ ; modified-Mott trimming algorithm), and assembled using the software GENEIOUS PRO 8.1 (Drummond *et al.*, 2010).

Protein-coding genes (PCGs), ribosomal RNA (rRNA) genes, transfer RNA (tRNA) genes, and non-coding regions of mtDNA sequences were predicted and annotated using MitoAnnotator, a web-based tool developed specifically for fish mitochondrial genome annotation (Iwasaki *et al.*, 2013). The limits of PCGs and rRNAs were manually adjusted based on the location of adjacent genes and the presence of start and stop codons (Table 1). tRNA genes were identified by their cloverleaf structure and the anticodon in the intergenic regions using ARWEN v. 1.2 (Laslett & Canbäck, 2008) and tRNAscan-SE v. 1.21 (Schattner, Brooks & Lowe, 2005), following the generalized vertebrate mitochondrial tRNA settings. The sequences obtained in this work have been deposited in GenBank under the accession numbers KT119410 (*N. brasiliensis*) and KT119411 (*N. bancroftii*).

#### ALIGNMENTS AND PHYLOGENETIC RECONSTRUCTIONS

Nucleotide sequences of the PCGs of the batoid species used in this study (Table 1) were translated into

amino acid sequences using the vertebrate mitochondrial genetic code, and aligned separately using the MAFFT platform of the TranslatorX multiple sequence alignment program (Abascal, Zardoya & Telford, 2010). Alignments were performed using the L-INS-i option (accurate for alignment of  $\leq 200$  sequences) and default settings. The alignments were back-translated into the corresponding nucleotide sequences. This alignment procedure helped avoid the destruction of codons and displacement of nucleotides and aimed to obtain a reliably homologous region (Abascal *et al.*, 2010; Gaitán-Espitia *et al.*, 2013). Ambiguously aligned sites were removed using GBLOCKS v. 0.19b implemented in TranslatorX (Abascal *et al.*, 2010) with default settings. Nucleotide sequences for individual PCG alignments were concatenated before the phylogenetic analysis.

A best partition scheme (BPS) analysis for the concatenated alignment was conducted with the program PartitionFinder (Lanfear *et al.*, 2012), as described in Cea *et al.* (2015). A total of 33 data blocks [11 PCGs excluding the *apocytochrome b* (*Cytb*) and *reduced nicotinamide adenine dinucleotide ubiquinone oxidoreductase subunit 6* (*Nad6*) genes] were defined, following the criteria of one data block for each codon position in each gene. The BPS included six subsets (Supporting Information Table S1) with the models of molecular evolution used for both Bayesian inference (BI) and maximum likelihood (ML) analyses. ML inference was performed with RAXML v. 7.2.6 (Stamatakis, 2006), using the graphical interface RaxML-GUI (Silvestro & Michalak, 2011) using the GTR + gamma model and the rapid bootstrap option with 1000 replicates. In addition, a BI Markov chain Monte Carlo analysis was conducted using MrBayes v. 3.2 (Ronquist & Huelsenbeck, 2003). The rate parameter was allowed to vary. Parameter estimation was 'unlinked' for the shape of the gamma distribution used to model rate variation among sites, the substitution matrix, the proportion of invariable sites, and the estimation of state frequencies. Six Markov chains were used, with each chain started from a random tree. The 'temperature' parameter was set to a default value of 0.2. Two simultaneous runs of 10 000 000 generations were conducted, and trees were sampled every 1000 generations. To establish whether the Markov chains had reached a steady state, we plotted the  $-\ln$  likelihood scores of sampled trees against generation time using TRACER v. 1.5 (Rambaut & Drummond, 2009). Trees inferred prior to stationarity (i.e. lack of improvement in the likelihood score) were discarded as burn-in (first 10% of the sampled trees), and the remaining trees were used to construct a 50% majority-rule consensus tree.

## RESULTS AND DISCUSSION

## MITOGENOME ARCHITECTURE OF ELECTRIC RAYS

The complete mitogenomes of the tropical electric rays *N. brasiliensis* and *N. bancroftii* encode the typical metazoan mtDNA genes, including cytochrome oxidase subunits (*Cox1*, *Cox2*, and *Cox3*), *Cytb*, reduced nicotinamide adenine dinucleotide ubiquinone oxidoreductase subunits (*Nad1*, *Nad2*, *Nad3*, *Nad4*, *Nad4L*, *Nad5*, and *Nad6*), the Adenosine Triphosphate synthase subunits (*Atp6–Atp8*), the small and large ribosomal RNAs (12S and 16S rRNAs), and a full set of tRNAs (Table 2, Fig. 2). All 22 tRNAs were within the size range of 68 to 75 bp, and each of them folded into a typical cloverleaf secondary structure as predicted by ARWEN and tRNAscan-SE. With the exception of the *Cox1* gene, which starts with a GTG codon, all other PCGs have the usual ATG start codon (Table 2), whereas the most frequent stop codon is TAA (Table 2). The size (16 997 and 16 971 bp for *N. brasiliensis* and *N. bancroftii*, respectively) and the architecture (Table 2, Fig. 2) of these two newly sequenced mitogenomes are consistent with the genomic features previously reported in other batoids (Inoue *et al.*, 2010; Castillo-Páez *et al.*, 2014; Chen *et al.*, 2014). In fact, transcriptional orientation, gene order/size, and nucleotide composition are highly conserved features amongst electric rays, skates, ‘guitarfishes’, stingrays, and their allies (Table S2). It is likely that the lack of gene rearrangements in the mitogenome of these cartilaginous fishes is maintained by functional (Blier *et al.*, 2006), molecular (Blier, Dufresne & Burton, 2001), and/or phylogenetic constraints (Bernt *et al.*, 2013b).

Nevertheless, some differences were observed in the size of the largest noncoding region, located between the *tRNA-Pro* and *tRNA-Phe* genes (Table 2, Fig. 2), which contains the putative origin for mitochondrial DNA replication (POR) in Batoidea (Castillo-Páez *et al.*, 2014; Chen *et al.*, 2014). In Torpediniformes, Rajiformes, Pristiformes, and ‘guitarfishes’, the POR ranges between 1060 and 1328 bp, whereas in Myliobatiformes the POR region exhibits the largest sizes, ranging between 1907 and 4490 bp (Poortvliet & Hoarau, 2013; Yang *et al.*, 2013; Austin *et al.*, 2014; Zhang *et al.*, 2015). These differences are probably explained by insertions and/or tandem-duplication events in the POR region (Ray & Densmore, 2002; Gaitán-Espitia *et al.*, 2013) after the split of the stingrays from the rest of the batoids approximately 160 Mya (Aschliman *et al.*, 2012a).

## PHYLOGENETIC RECONSTRUCTION

Batoidean evolutionary relationships have been examined in many morphological and molecular stud-

ies that have helped to disentangle the higher phylogenetic framework of living batoid fishes. Nevertheless, the phylogenetic relationships within this group remain controversial due in great part to the phylogenetic position of the Torpediniformes (Rocco, 2013) and the unresolved inter-relationships within electric rays (Aschliman *et al.*, 2012a; Naylor *et al.*, 2012; Claeson, 2014). Our phylogenetic reconstruction using both BI and ML analyses produced identical topologies with similar branch lengths. These analyses support the monophyly of each of the four Batoidea orders, with high posterior probabilities and bootstrap values (Fig. 3). Importantly, our phylogenetic reconstruction supports the hypothesis that electric rays are sister to thornback rays (Platyrrhiniidae; Aschliman *et al.*, 2012a; Naylor *et al.*, 2012), which were previously considered to belong to the ‘guitarfishes’ by Compagno (1999) and to Myliobatiformes by McEachran & Aschliman (2004) and Nelson (2006). In our study, the Torpediniformes + Platyrrhiniidae clade was found in a sister relationship to a group containing the Myliobatiformes + Pristiformes (including ‘guitarfishes’) and the Rajiformes (Fig. 3). The position of electric rays in our phylogeny is congruent with previous morphological (McEachran & Aschliman, 2004; Schaefer & Summers, 2005; Aschliman *et al.*, 2012b; Claeson, 2014) and molecular studies (Rocco *et al.*, 2007; Rocco, 2013). Other important differences between our results and those presented in previous publications are related to the phylogenetic position of skates, ‘sawfishes’, and ‘guitarfishes’. For instance, phylogenetic reconstructions using partial mitochondrial and nuclear genes have recovered Rajiformes (Aschliman *et al.*, 2012a; Naylor *et al.*, 2012) or Pristiformes + Rhinobatiformes (Pavan-Kumar *et al.*, 2014) as the most derived batoid group with moderate to weak BI and ML supports. Within the last group, our results indicate that the family Zanobatidae is the most external taxon of the clade (Fig. 3), which departs from the previously proposed incorporation of this group into the Myliobatiformes clade (McEachran & Aschliman, 2004; Nelson, 2006; Aschliman *et al.*, 2012a). It is possible that the discrepancies discussed above can be explained by the different methodologies implemented (e.g. Aschliman *et al.*, 2012a) and in particular by the distinct datasets analyzed (morphological, nuclear, mitochondrial and cytogenetic). In this study, in addition to assessing the variation at a mitogenomic scale, we used a methodology that concatenates PCG sequences and sets the best model of evolution for each codon position within each of the PCGs. This method has been described as an accurate strategy with which to account for variable evolutionary histories of different loci in mitochondrial phylogenomic analyses (Leavitt *et al.*, 2013), allowing in

**Table 2.** Mitochondrial genome content and general features of the *Narcine brasiliensis* and *Narcine bancroftii*

| Name       | Direction | <i>Narcine brasiliensis</i> |        |        |             |            |      | <i>Narcine bancroftii</i> |        |        |             |            |      |
|------------|-----------|-----------------------------|--------|--------|-------------|------------|------|---------------------------|--------|--------|-------------|------------|------|
|            |           | Length (bp)                 | Min    | Max    | Start codon | Stop codon | AT%  | Length (bp)               | Min    | Max    | Start codon | Stop codon | AT%  |
| tRNA-Phe   | Forward   | 70                          | 1      | 70     |             |            |      | 70                        | 1      | 70     |             |            |      |
| 12S rRNA   | Forward   | 972                         | 75     | 1046   |             |            |      | 966                       | 76     | 1,041  |             |            |      |
| tRNA-Val   | Forward   | 70                          | 1048   | 1117   |             |            |      | 70                        | 1042   | 1,111  |             |            |      |
| 16S rRNA   | Forward   | 1686                        | 1118   | 2803   |             |            |      | 1683                      | 1112   | 2,794  |             |            |      |
| tRNA-Leu   | Forward   | 75                          | 2804   | 2878   |             |            |      | 75                        | 2796   | 2,87   |             |            |      |
| NAD1 gene  | Forward   | 975                         | 2879   | 3853   | ATG         | ACA        | 62.9 | 975                       | 2871   | 3,845  | ATG         | ACA        | 62.2 |
| tRNA-Ile   | Forward   | 70                          | 3855   | 3924   |             |            |      | 70                        | 3847   | 3,916  |             |            |      |
| tRNA-Gln   | Reverse   | 70                          | 3923   | 3992   |             |            |      | 70                        | 3915   | 3,984  |             |            |      |
| tRNA-Met   | Forward   | 69                          | 3996   | 4064   |             |            |      | 69                        | 399    | 4,058  |             |            |      |
| NAD2 gene  | Forward   | 1044                        | 4066   | 5109   | ATG         | CTA        | 64.2 | 1                         | 4059   | 5102   | ATG         | CTA        | 64.2 |
| tRNA-Trp   | Forward   | 69                          | 5112   | 5180   |             |            |      | 70                        | 5102   | 5171   |             |            |      |
| tRNA-Ala   | Reverse   | 69                          | 5183   | 5251   |             |            |      | 69                        | 5174   | 5,242  |             |            |      |
| tRNA-Asn   | Reverse   | 72                          | 5254   | 5325   |             |            |      | 72                        | 5245   | 5,316  |             |            |      |
| tRNA-Cys   | Reverse   | 68                          | 5359   | 5427   |             |            |      | 68                        | 5352   | 5,419  |             |            |      |
| tRNA-Tyr   | Reverse   | 69                          | 5432   | 5501   |             |            |      | 69                        | 5424   | 5,492  |             |            |      |
| COX1 gene  | Forward   | 1560                        | 5502   | 7061   | GTG         | TAT        | 63.1 | 1560                      | 5494   | 7,053  | GTG         | TAT        | 62.9 |
| tRNA-Ser   | Reverse   | 72                          | 7064   | 7135   |             |            |      | 73                        | 7056   | 7,128  |             |            |      |
| tRNA-Asp   | Forward   | 69                          | 7136   | 7204   |             |            |      | 69                        | 7129   | 7,197  |             |            |      |
| COX2 gene  | Forward   | 693                         | 7209   | 7901   | ATG         | TCT        | 62.6 | 693                       | 7202   | 7,894  | ATG         | TCT        | 62.3 |
| tRNA-Lys   | Forward   | 75                          | 7903   | 7977   |             |            |      | 75                        | 7896   | 797    |             |            |      |
| ATP8 gene  | Forward   | 168                         | 7979   | 8147   | ATG         | TAA        | 68.2 | 168                       | 7973   | 814    | ATG         | TAA        | 68.5 |
| ATP6 gene  | Forward   | 684                         | 8138   | 8821   | ATG         | TAA        | 69.9 | 687                       | 8131   | 8,817  | ATG         | TAA        | 69.3 |
| COX3 gene  | Forward   | 786                         | 8822   | 9607   | ATG         | TCA        | 58.5 | 786                       | 8818   | 9,603  | ATG         | TCA        | 57.6 |
| tRNA-Gly   | Forward   | 72                          | 9609   | 9680   |             |            |      | 72                        | 9605   | 9,676  |             |            |      |
| NAD3 gene  | Forward   | 351                         | 9681   | 10,031 | ATG         | GAA        | 65.2 | 351                       | 9677   | 10,003 | ATG         | GAA        | 64.7 |
| tRNA-Arg   | Forward   | 71                          | 10,031 | 10,101 |             |            |      | 71                        | 10,027 | 10,097 |             |            |      |
| NAD4L gene | Forward   | 297                         | 10,102 | 10,398 | ATG         | TGT        | 64   | 297                       | 10,098 | 10,394 | ATG         | TGC        | 64.6 |
| NAD4 gene  | Forward   | 1383                        | 10,392 | 11,774 | ATG         | TTT        | 67   | 1383                      | 10,388 | 11,770 | ATG         | TTT        | 66.8 |
| tRNA-His   | Forward   | 69                          | 11,775 | 11,843 |             |            |      | 69                        | 11,771 | 11,839 |             |            |      |
| tRNA-Ser   | Forward   | 68                          | 11,844 | 11,911 |             |            |      | 69                        | 11,840 | 11,908 |             |            |      |
| tRNA-Leu   | Forward   | 73                          | 11,913 | 11,985 |             |            |      | 73                        | 11,908 | 11,980 |             |            |      |
| NAD5 gene  | Forward   | 1824                        | 11,986 | 13,809 | ATG         | CGA        | 64.7 | 1818                      | 11,981 | 13,798 | ATG         | CGA        | 64.7 |
| NAD6 gene  | Reverse   | 516                         | 13,797 | 14,312 | ATG         | GTA        | 66.9 | 516                       | 13,786 | 14,301 | ATG         | GTA        | 64.7 |
| tRNA-Glu   | Reverse   | 69                          | 14,315 | 14,383 |             |            |      | 69                        | 14,302 | 14,370 |             |            |      |
| CYTb gene  | Forward   | 1140                        | 14,387 | 15,526 | ATG         | CTA        | 61.5 | 1140                      | 14,374 | 15,513 | ATG         | CTA        | 61.4 |
| tRNA-Thr   | Forward   | 73                          | 15,529 | 15,601 |             |            |      | 74                        | 15,516 | 15,589 |             |            |      |
| tRNA-Pro   | Reverse   | 69                          | 15,606 | 15,674 |             |            |      | 69                        | 15,595 | 15,663 |             |            |      |

ATP, Adenosine triphosphate synthase subunit; COX, cytochrome oxidase subunit; CYTB, apocytochrome b; NAD, reduced nicotinamide adenine dinucleotide ubiquinone oxidoreductase subunit; rRNA, ribosomal RNA; tRNA, transfer RNA. Min and Max refer to initial and final position in the mitogenome.

our case a better resolution of the phylogenetic relationships amongst orders of Batoidea.

Within Torpediniformes, the tropical electric rays *N. brasiliensis* and *N. bancroftii* are sister to each other, sharing a most recent common ancestor with the giant electric ray *N. entemedor* and the Australian numbfish *N. tasmaniensis* (Fig. 3). In our analyses, this group was in a close relationship with the blind electric ray *Ty. aysoni* (Fig. 3). These two lineages share some morphological features such as disc shape, the presence of stout jaws, and strong labial cartilages (Nelson, 2006), and their divergence

time is estimated to be approximately 64 Mya, at the beginning of the Cenozoic (Aschliman *et al.*, 2012a). In conjunction with these results, our BI and ML analyses suggest that the short-tail electric ray *To. macneilli* branched off early in the monophyletic electric ray lineage (Fig. 3), with the estimated divergence time for the split between *Torpedo* and the rest of the numbfishes dated at the end of the Mesozoic, approximately 73 Mya (Aschliman *et al.*, 2012a). Based on these findings, our results reject the nonmonophyletic hypothesis of the genus *Narcine* reported in other studies using the *Nad2* gene

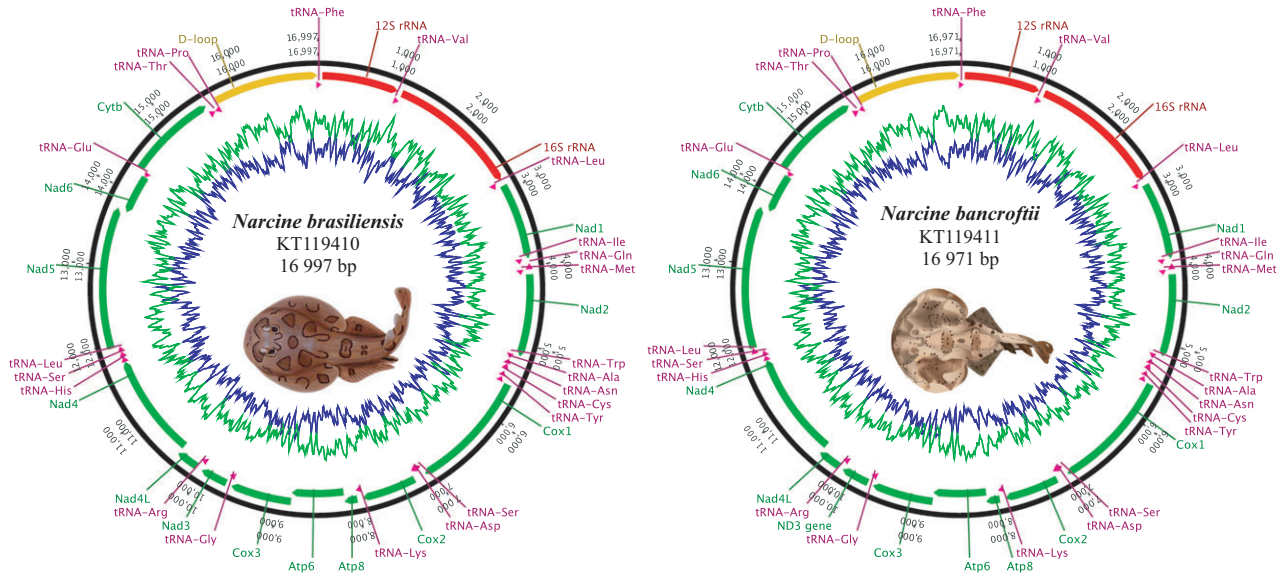

**Figure 2.** Schematic representation of the mitochondrial genome architecture, AT (blue) and CG (green) content of the tropical electric rays *Narcine brasiliensis* and *Narcine bancroftii*. Abbreviations: Atp, Adenosine Triphosphate synthase subunit; Cox, cytochrome oxidase subunit; Cytb, apocytocrome b; Nad, reduced nicotinamide adenine dinucleotide ubiquinone oxidoreductase subunit; rRNA, ribosomal RNA; tRNA, transfer RNA.

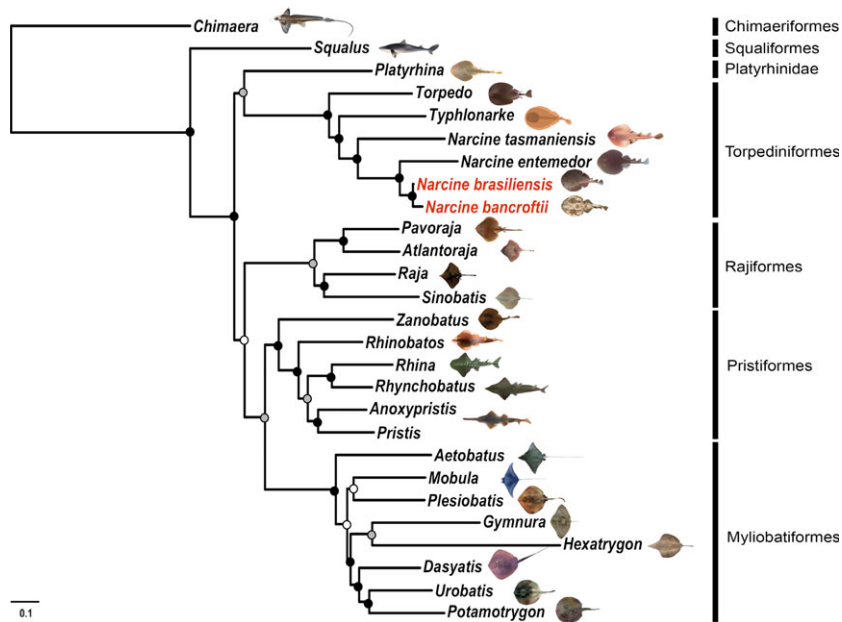

**Figure 3.** Maximum likelihood (ML) tree of concatenated protein-coding genes describing phylogenetic relationships amongst batoids. The ML bootstrap and Bayesian posterior probability values for each node are indicated (black circles: bootstrap value  $\geq 90\%$  and posterior probability of 1; grey circles: bootstrap value  $< 90\%$  and posterior probability of 1; white circles: bootstrap value  $< 90\%$  and posterior probability  $< 1$ ). The scale bar represents the number of nucleotide substitutions per site.

(Naylor *et al.*, 2012), and resolve one of the complex cases of generic nonmonophyly within electric rays. However, further studies including additional data

sets (both mtDNA and nuclear DNA) and more representative species of the subfamilies Torpedininae, Hyppninae, Narcininae, and Narkidae, are required in

order to obtain a more accurate resolution of the phylogenetic relationships within Torpediniformes.

### CONCLUSION

The sequenced mitogenomes of the tropical electric rays *N. brasiliensis* and *N. bancroftii* exhibit similarities in size (16 997 and 16 971 bp, respectively), transcriptional orientation, gene order, and nucleotide composition in comparison to other electric rays, skates, 'guitarfishes', stingrays, and their allies. With the incorporation of these two newly sequenced mitogenomes, our molecular phylogenetic reconstruction of the order Torpediniformes is the most complete to date, including six mitogenomes in total. Based on the concatenated alignment of PCGs, our phylogenetic analyses support the hypothesis that electric rays are closely related to thornback rays (Platyrrhinidae), forming a clade in a sister position to the remaining three batoid orders. Within Torpediniformes, our results reject the non-monophyletic hypothesis of the genus *Narcine* reported in previous morphological and molecular studies. Further mitogenomic exploration of interfamilial relationships within Torpediniformes will require increased taxon sampling of poorly represented groups such as Torpedininae, Hypninae, and Narkidae.

### ACKNOWLEDGEMENTS

This study was supported by Fondo Nacional de Desarrollo Científico y Tecnológico (FONDECYT)-Postdoctoral grant no. 3130381 (J. D. G.-E.). The authors thank Debby Ng, Ross Daley, and the anonymous reviewers for their critical comments on this paper. We also thank Alejandra Tejada Martinez for her help with the illustrations.

### REFERENCES

- Abascal F, Zardoya R, Telford M. 2010. TranslatorX: multiple alignment of nucleotide sequences guided by amino acid translations. *Nucleic Acids Research* **38**: W7–W13.
- Alam MT, Petit RA, Read TD, Dove ADM. 2014. The complete mitochondrial genome sequence of the world's largest fish, the whale shark (*Rhincodon typus*), and its comparison with those of related shark species. *Gene* **539**: 44–49.
- Aschliman NC, Nishida M, Miya M, Inoue JG, Rosana KM, Naylor GJP. 2012a. Body plan convergence in the evolution of skates and rays (Chondrichthyes: Batoidea). *Molecular Phylogenetics and Evolution* **63**: 28–42.
- Aschliman NC, Claeson KM, McEachran JD. 2012b. Phylogeny of Batoidea. In: Carrier J, Musick J, Heithaus M, eds. *Biology of sharks and their relatives*. Boca Raton, FL: CRC Press, 57–94.
- Austin CM, Tan MH, Lee Y, Croft LJ, Meekan MG, Gan HM. 2014. The complete mitogenome of the cow tail ray *Pastinachus atrus* (Macleay, 1883) (Elasmobranchii; Myliobatiformes; Dasyatidae). *Mitochondrial DNA* **1736**: 1–2.
- Bernt M, Bleidorn C, Braband A, Dambach J, Donath A, Fritzsche G, Golombek A, Hadrys H, Jühling F, Meusemann K, Middendorf M. 2013a. A comprehensive analysis of bilaterian mitochondrial genomes and phylogeny. *Molecular Phylogenetics and Evolution* **69**: 352–364.
- Bernt M, Braband A, Schierwater B, Stadler PF. 2013b. Genetic aspects of mitochondrial genome evolution. *Molecular Phylogenetics and Evolution* **69**: 328–338.
- Blier PU, Dufresne F, Burton RS. 2001. Natural selection and the evolution of mtDNA-encoded peptides: evidence for intergenomic co-adaptation. *Trends in Genetics* **17**: 400–406.
- Blier PU, Breton S, Desrosiers V, Lemieux H. 2006. Functional conservatism in mitochondrial evolution: insight from hybridization of arctic and brook charrs. *Journal of Experimental Zoology Part B: Molecular and Developmental Evolution* **306**: 425–432.
- Boore JL, Brown WM. 1998. Big trees from little genomes: mitochondrial phylogenetic tool gene order as a phylogenetic tool. *Current Opinion in Genetics & Development* **8**: 668–674.
- Botero-Castro F, Tilak MKA, Justy F, Catzeflis F, Del-suc F, Douzery EJP. 2013. Next-generation sequencing and phylogenetic signal of complete mitochondrial genomes for resolving the evolutionary history of leaf-nosed bats (Phyllostomidae). *Molecular phylogenetics and evolution* **69**: 728–739.
- de Carvalho MR, Séret B, Compagno LJV. 2002. A new species of electric ray of the genus *Narcine* Henle, 1834 from the South-Western Indian Ocean (Chondrichthyes: Torpediniformes: Narcinidae). *South African Journal of Marine Science* **24**: 135–149.
- de Carvalho MR, McCord ME, Myers RA. 2007. *Narcine bancroftii*. The IUCN Red List of Threatened Species 2007, e.T63142A12622582. Available at: <http://dx.doi.org/10.2305/IUCN.UK.2007.RLTS.T63142A12622582.en>. Accessed on 21 March 2016.
- Castillo-Páez A, del Río-Portilla MA, Rocha-Olivares A. 2014. The complete mitochondrial genome of the giant electric ray, *Narcine entemedor* (Elasmobranchii: Torpediniformes). *Mitochondrial DNA* **1736**: 1–3.
- Cea G, Gaitán-Espitia JD, Cárdenas L. 2015. Complete mitogenome of the edible sea urchin *Loxechinus albus*: genetic structure and comparative genomics within Echinozoa. *Molecular Biology Reports* **42**: 1081–1089.
- Chen X, Ai W, Xiang D, Pan L, Shi X. 2014. Complete mitogenome of the brown guitarfish *Rhinobatos schlegelii* (Rajiformes, Rhinobatidae). *Mitochondrial DNA* **1736**: 1–2.
- Claeson KM. 2014. The impacts of comparative anatomy of electric rays (Batoidea: Torpediniformes) on their systematic hypotheses. *Journal of Morphology* **275**: 597–612.
- Compagno LJV. 1999. Checklist of living elasmobranchs. In: Hamlett WC, ed. *Sharks, Skates, and Rays: The Biology of Elasmobranch Fishes*. Baltimore: The John Hopkins University Press, 471–498.



- Dilly GF, Gaitán-Espitia JD, Hofmann GE. 2015.** Characterization of the Antarctic sea urchin (*Sterechinus neumayeri*) transcriptome and mitogenome: a molecular resource for phylogenetics, ecophysiology and global change biology. *Molecular Ecology Resources* **15**: 425–436.
- Douady CJ, Dosay M, Shivji MS, Stanhope MJ. 2003.** Molecular phylogenetic evidence refuting the hypothesis of Batoidea (rays and skates) as derived sharks. *Molecular Phylogenetics and Evolution* **26**: 215–221.
- Drummond A, Ashton B, Buxton S, Cheung M, Cooper A, Duran C, Field M, Heled J, Kearse M, Markowitz S, Moir R, Stones-Havas S, Sturrock S, Thierer T, Wilson A. 2010.** GENEIOUS Version 8.1. Available at: <http://www.geneious.com>.
- Fowler SL. 2005.** *Sharks, Rays and Chimaeras: The Status of the Chondrichthyan Fishes: Status Survey*. IUCN/SSC Shark Specialist Group. IUCN: Gland, Switzerland x + 461 pp.
- Franklin O, Palmer C, Dyke G. 2014.** Pectoral fin morphology of batoid fishes (Chondrichthyes: Batoidea): Explaining phylogenetic variation with geometric morphometrics. *Journal of Morphology* **275**: 1173–1186.
- Gaitán-Espitia JD, Hofmann GE. 2016.** Mitochondrial genome architecture of the giant red sea urchin *Mesocentrotus franciscanus* (Strongylocentrotidae, Echinoida). *Mitochondrial DNA* **27**: 591–592.
- Gaitán-Espitia JD, López A. 2008.** Presencia de juveniles de tiburón aletinegro *Carcharhinus limbatus* (Carcharhiniformes: Carcharhinidae) en la zona norte de la ecoregión Tayrona, Caribe colombiano. *Latin American Journal of Aquatic Research* **36**: 115–119.
- Gaitán-Espitia JD, Nespolo RF, Opazo JC. 2013.** The complete mitochondrial genome of the land snail *Cornu aspersum* (Helicidae: Mollusca): intra-specific divergence of protein-coding genes and phylogenetic considerations within Euthyneura. *PLoS ONE* **8**: e67299.
- Galtier N, Nabholz B, Glémin S, Hurst GDD. 2009.** Mitochondrial DNA as a marker of molecular diversity: a reappraisal. *Molecular Ecology* **18**: 4541–4550.
- Gillett CPDT, Crampton-Platt A, Timmermans MJTN, Jordal BH, Emerson BC, Vogler AP. 2014.** Bulk *de novo* mitogenome assembly from pooled total DNA elucidates the phylogeny of weevils (Coleoptera: Curculionidae). *Molecular Biology and Evolution* **31**: 2223–2237.
- Inoue JG, Miya M, Lam K, Tay BH, Danks J a., Bell J, Walker TI, Venkatesh B. 2010.** Evolutionary origin and phylogeny of the modern holocephalans (Chondrichthyes: Chimaeriformes): a mitogenomic perspective. *Molecular Biology and Evolution* **27**: 2576–2586.
- Iwasaki W, Fukunaga T, Isagozawa R, Yamada K, Maeda Y, Satoh T, Sado T, Mabuchi K, Takeshima H, Miya Nishida M. 2013.** MitoFish and MitoAnnotator: a mitochondrial genome database of fish with an accurate and automatic annotation pipeline. *Molecular Biology and Evolution* **30**: 2531–2540.
- Lanfear R, Calcott B, Ho SYW, Guindon S. 2012.** PartitionFinder: combined selection of partitioning schemes and substitution models for phylogenetic analyses. *Molecular Biology and Evolution* **29**: 1695–1701.
- Laslett D, Canbäck B. 2008.** ARWEN, a program to detect tRNA genes in metazoan mitochondrial nucleotide sequences. *Bioinformatics* **24**: 172–175.
- Leavitt JR, Hiatt KD, Whiting MF, Song H. 2013.** Searching for the optimal data partitioning strategy in mitochondrial phylogenomics: a phylogeny of Acridoidea (Insecta: Orthoptera: Caelifera) as a case study. *Molecular Phylogenetics and Evolution* **67**: 494–508.
- Luo C, Tsementzi D, Kyrpides N, Read T, Konstantinidis KT. 2012.** Direct comparisons of Illumina vs. Roche 454 sequencing technologies on the same microbial community DNA sample. *PLoS ONE* **7**: e30087.
- Martin AP. 1995.** Mitochondrial DNA sequence evolution in sharks: rates, patterns, and phylogenetic inferences. *Molecular Biology and Evolution* **12**: 1114–1123.
- Martin AP, Naylor GJ, Palumbi SR. 1992.** Rates of mitochondrial DNA evolution in sharks are slow compared with mammals. *Nature* **357**: 153–155.
- McEachran JD, Aschliman N. 2004.** Phylogeny of Batoidea. In: Carrier J, Musick J, Heithaus M, eds. *Biology of sharks and their relatives*. Boca Raton, Florida: CRC Press, 115–135.
- McEachran JD, Carvalho MD. 2002.** *Batoid fishes. The living marine resources of the Western Central Atlantic* FAO Species Identification. Guide for Fishery Purposes and American Society of Ichthyologists and Herpetologists. Rome: FAO. 507–589.
- Naylor GJ, Caira JN, Jensen K, Rosana KA, Straube N, Lakner C. 2012.** Elasmobranch Phylogeny: A Mitochondrial Estimate Based on 595 Species. In: Carrier JC, Musick JA, Heithaus MR eds. *The biology of sharks and their relatives*, 2nd edn. Boca Raton, FL: CRC Press. 31–56.
- Nelson J. 2006.** *Fishes of the world*. New York, USA: John Wiley & Sons.
- Pavan-Kumar A, Gireesh-Babu P, Babu P, Jaiswar A, Krishna V, Prasad K, Chaudhari A, Raje S, Chakraborty S, Krishna G, Lakra W. 2014.** Molecular phylogeny of elasmobranchs inferred from mitochondrial and nuclear markers. *Molecular Biology Reports* **41**: 447–457.
- Perseke M, Golombek A, Schlegel M, Struck TH. 2013.** The impact of mitochondrial genome analyses on the understanding of deuterostome phylogeny. *Molecular Phylogenetics and Evolution* **66**: 898–905.
- Poortvliet M, Hoarau G. 2013.** The complete mitochondrial genome of the Spinetail Devilray, *Mobula japanica*. *Mitochondrial DNA* **24**: 28–30.
- Poortvliet M, Olsen J, Croll DA, Bernardi G, Newton K, Kollias S, O'Sullivan J, Fernando D, Stevens G, Magaña F, Seret B. 2015.** A dated molecular phylogeny of manta and devil rays (Mobulidae) based on mitogenome and nuclear sequences. *Molecular Phylogenetics and Evolution* **83**: 72–85.
- Rambaut A, Drummond A. 2009.** Tracer: MCMC trace analysis tool v1.5.0. Available at: <http://beast.bio.ed.ac.uk>.
- Ramírez-Hernández A, Palacios-Barreto P, Gaitán-Espitia JD, Reyes F, Ramírez J. 2011.** Morphological abnormality in the longnose stingray *Dasyatis guttata* (Myliobatiformes: Dasyatidae) in the Colombian Caribbean. *Cybium* **35**: 79–80.

- Ray D, Densmore L. 2002.** The crocodilian mitochondrial control region: general structure, conserved sequences, and evolutionary implications. *Journal of Experimental Zoology* **294**: 334–345.
- Rocco L. 2013.** Molecular and Chromosomal Markers for Evolutionary Considerations in Torpediniformes (Chondrichthyes, Batoidea). *ISRN Genetics* **2013**: 1–10.
- Rocco L, Liguori I, Costagliola D, Morescalchi MA, Tinti F, Stingo V. 2007.** Molecular and karyological aspects of Batoidea (Chondrichthyes, Elasmobranchi) phylogeny. *Gene* **389**: 80–86.
- Ronquist F, Huelsenbeck J. 2003.** MrBayes 3: Bayesian phylogenetic inference under mixed models. *Bioinformatics* **19**: 1572–1574.
- Rosa RS, Furtado M. 2007.** *Narcine brasiliensis*. *The IUCN Red List of Threatened Species 2007*, e.T63157A12602819. Available at: <http://dx.doi.org/10.2305/IUCN.UK.2007.RLTS.T63157A12602819.en>. Accessed on 21 March 2016.
- Schaefer JT, Summers AP. 2005.** Batoid wing skeletal structure: Novel morphologies, mechanical implications, and phylogenetic patterns. *Journal of Morphology* **264**: 298–313.
- Schattner P, Brooks AN, Lowe TM. 2005.** The tRNAscan-SE, snoscan and snoGPS web servers for the detection of tRNAs and snoRNAs. *Nucleic Acids Research* **33**: W686–W689.
- Silvestro D, Michalak I. 2011.** RaxmlGUI: a graphical front-end for RAxML. *Organisms Diversity & Evolution* **12**: 335–337.
- Stamatakis A. 2006.** RAxML-VI-HPC: maximum likelihood-based phylogenetic analyses with thousands of taxa and mixed models. *Bioinformatics (Oxford, England)* **22**:2688–2690.
- Yang B, Zhang J, Yamaguchi A, Zhang B. 2013.** Mitochondrial genome of *Dasyatis bennettii* (Chondrichthyes: Dasyatidae). *Mitochondrial DNA* **24**: 344–346.
- Zhang J, Yang B, Yamaguchi A, Furumitsu K, Zhang B. 2015.** Mitochondrial genome of longheaded eagle ray *Aetobatus flagellum* (Chondrichthyes: Myliobatidae). *Mitochondrial DNA* **26**: 763–764.

#### SUPPORTING INFORMATION

Additional supporting information may be found online in the supporting information tab for this article:

**Table S1.** Best partition scheme and best-fit models of molecular evolution for the mitochondrial protein-coding genes alignment.

**Table S2.** Structural characteristics of the mitochondrial genomes of the elasmobranch species used in this study.
